# Supplementary material for: A simple quinoline-derived fluorescent sensor for the selective and sequential detection of copper(ii) and sulfide ions and its application in living-cell imaging
Source: Royal Society of Chemistry journal article supplement (doi:10.1039/c6ra15938a), 2016-01-01
Supplement: c6ra15938a1.pdf [file c6ra15938a1.pdf]

# Supporting Information

## A Simple Quinoline-derived Fluorescent Sensor for Selective and Sequential Detection of Copper (II) and Sulfide Ions and Its Application in Living-cell Imaging

Haiyang Liu<sup>a,b</sup>, Fengxu Wu<sup>c</sup>, Bibo Zhang<sup>a,b</sup>, Chunyan Tan<sup>a,b</sup>, Yuzong Chen<sup>d</sup>, Gefei Hao<sup>c</sup>,  
Ying Tan<sup>a,b\*</sup>, Yuyang Jiang<sup>a,b\*</sup>

<sup>a</sup> Department of Chemistry, Tsinghua University, Beijing, 100084, PR China

<sup>b</sup> The Ministry-Province Jointly Constructed Base for State Key Lab-Shenzhen Key  
Laboratory of Chemical Biology, the Graduate School at Shenzhen, Tsinghua University,  
Shenzhen, Guangdong 518055, PR China

<sup>c</sup> Key Laboratory of Pesticide & Chemical Biology of Ministry of Education, College of  
Chemistry, Central China Normal University, Wuhan 430079, P. R. China

<sup>d</sup> Shenzhen Technology and Engineering Laboratory for Personalized Cancer Diagnostics and  
Therapeutics, Shenzhen Kivita Innovative Drug Discovery Institute, Shenzhen 518055,  
Guangdong, China

\* Corresponding author

Tel: +86-0755-26036017, Fax: +86-0755-26032094

*E-mail addresses:* tan.ying@sz.tsinghua.edu.cn (Y. Tan), jiangyy@sz.tsinghua.edu.cn (Y.  
Jiang).

## Contents

|                                                                                  |       |
|----------------------------------------------------------------------------------|-------|
| 1. $^1\text{H}$ NMR spectrum obtained for BMA.....                               | 3     |
| 2. $^1\text{H}$ NMR, $^{13}\text{C}$ NMR, and MS spectrum obtained for QLBA..... | 4-6   |
| 3. The selectivity of QLBA.....                                                  | 7     |
| 4. Competitive experiments for QLBA.....                                         | 8     |
| 5. pH analysis.....                                                              | 9     |
| 6. $^1\text{H}$ NMR of QLBA under different pH.....                              | 10    |
| 7. HRMS for QLBA and QLBA-Cu under different pH.....                             | 11-12 |
| 8. Fluorescence titration analysis.....                                          | 13    |
| 9. Fluorescence titration analysis in tap-water.....                             | 14    |
| 10. MTT analysis.....                                                            | 15    |
| 11. Calculation of the limit of detection .....                                  | 16    |
| 12. References.....                                                              | 17    |

## 1. $^1\text{H}$ NMR spectrum obtained for BMA

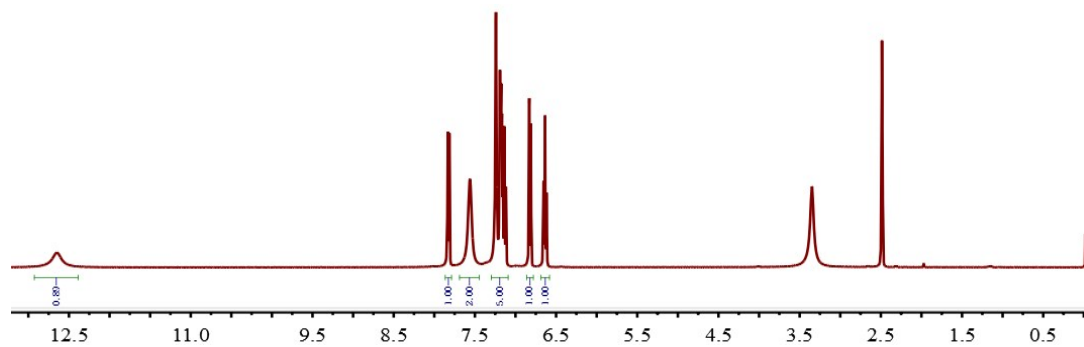

**Figure S1.**  $^1\text{H}$  NMR of BMA (400 MHz,  $\text{DMSO-}d_6$ )  $\delta$  (ppm): 12.65 (s, 1H), 7.82 (d,  $J = 8.4$  Hz, 1H), 7.56 (s, 2H), 7.18 (m, 5H), 6.82 (m, 1H), 6.64 (m, 1H).

## 2. $^1\text{H}$ NMR, $^{13}\text{C}$ NMR, and MS spectrum obtained for QLBA

### $^1\text{H}$ NMR of QLBA

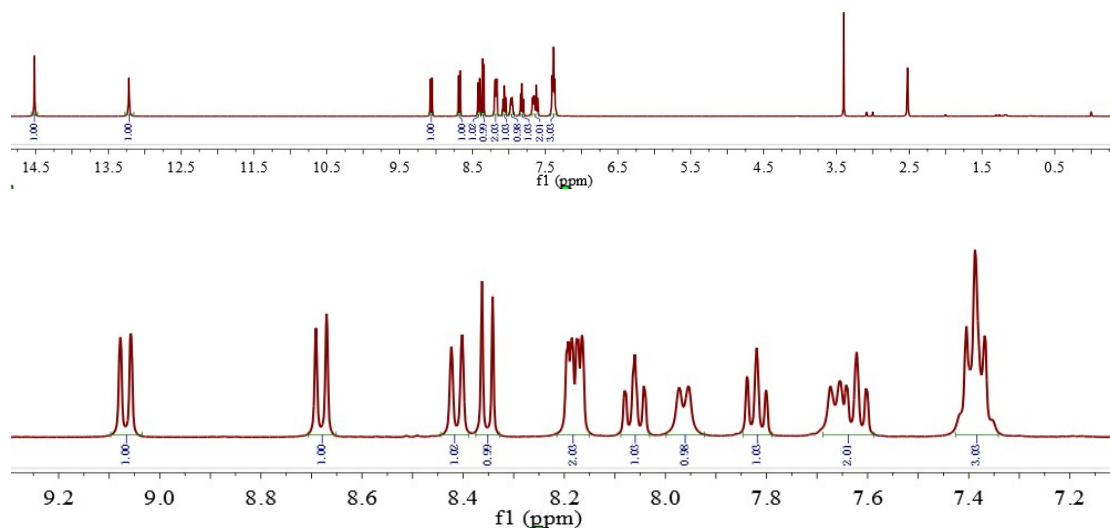

**Figure S2.**  $^1\text{H}$  NMR (400 MHz,  $\text{DMSO-}d_6$ )  $\delta$  (ppm): 14.52 (s, 1H), 13.22 (s, 1H), 9.07 (d,  $J = 8.2$  Hz, 1H), 8.68 (d,  $J = 8.0$ , 1H), 8.41 (d,  $J = 8.0$  Hz, 1H), 8.35 (d,  $J = 8.0$  Hz, 1H), 8.18 (m, 2H), 8.06 (t,  $J = 8.0$  Hz, 1H), 7.96 (d,  $J = 8.0$  Hz, 1H), 7.82 (t,  $J = 8.0$ , 1H), 7.64 (m, 2H), 7.39 (m, 3H). The above is the whole spectrum of  $^1\text{H}$  NMR and the below is the partial spectrum.

### <sup>13</sup>C NMR of QLBA

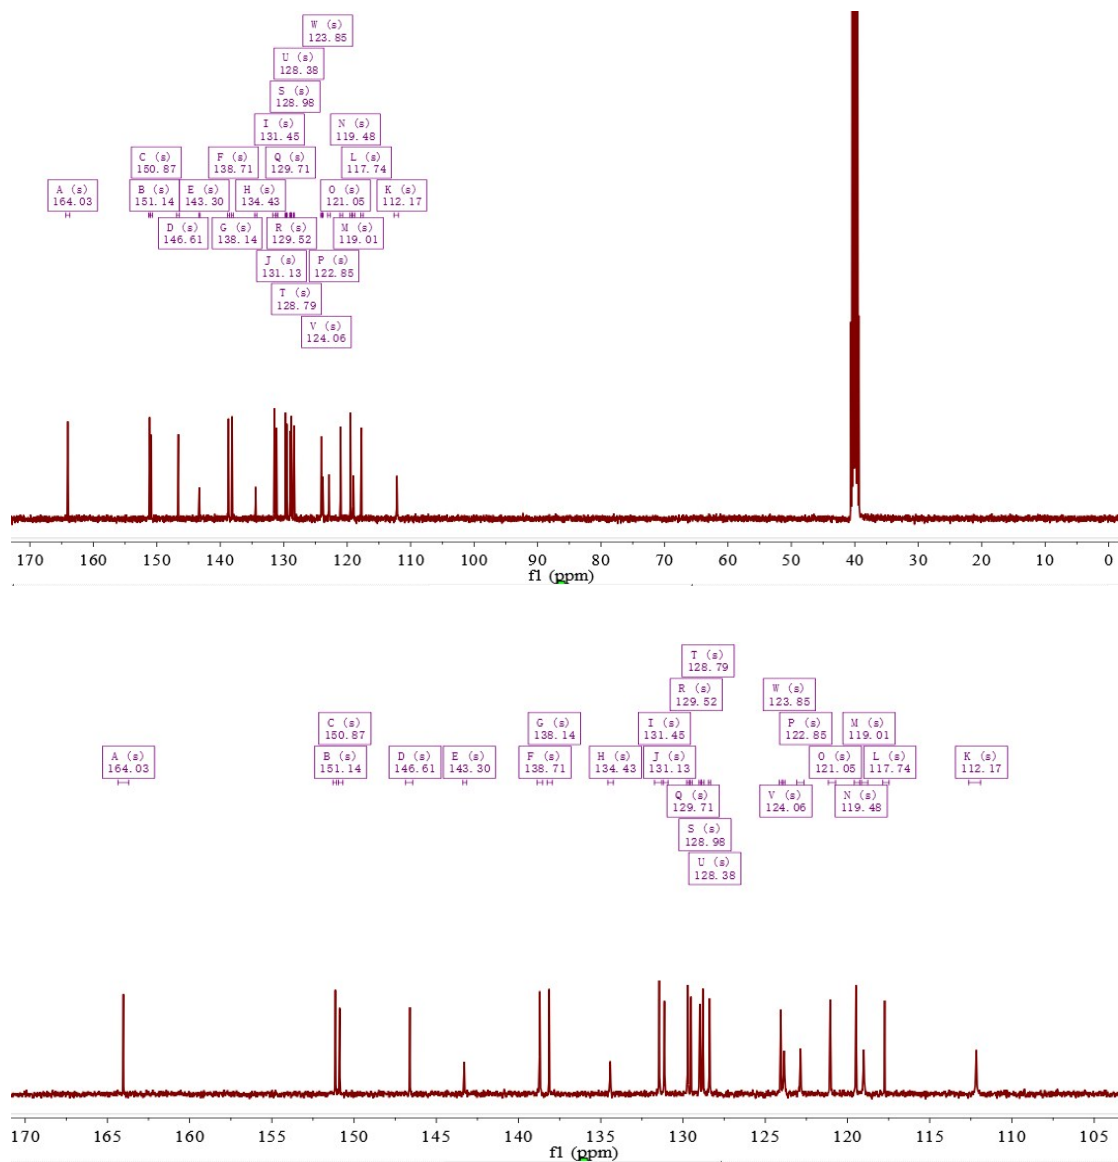

**Figure S3.** <sup>13</sup>C NMR (100 MHz, DMSO-*d*<sub>6</sub>) δ (ppm): 164.03, 151.14, 150.87, 146.61, 143.30, 138.71, 138.14, 134.43, 131.45, 131.13, 129.71, 129.52, 128.98, 128.79, 128.38, 124.06, 123.85, 122.84, 121.08, 119.48, 119.01, 117.74, 112.17 (Fig. S2). The above is the whole spectrum of <sup>13</sup>C NMR and the below is the partial spectrum.

## ESI mass spectra of QLBA

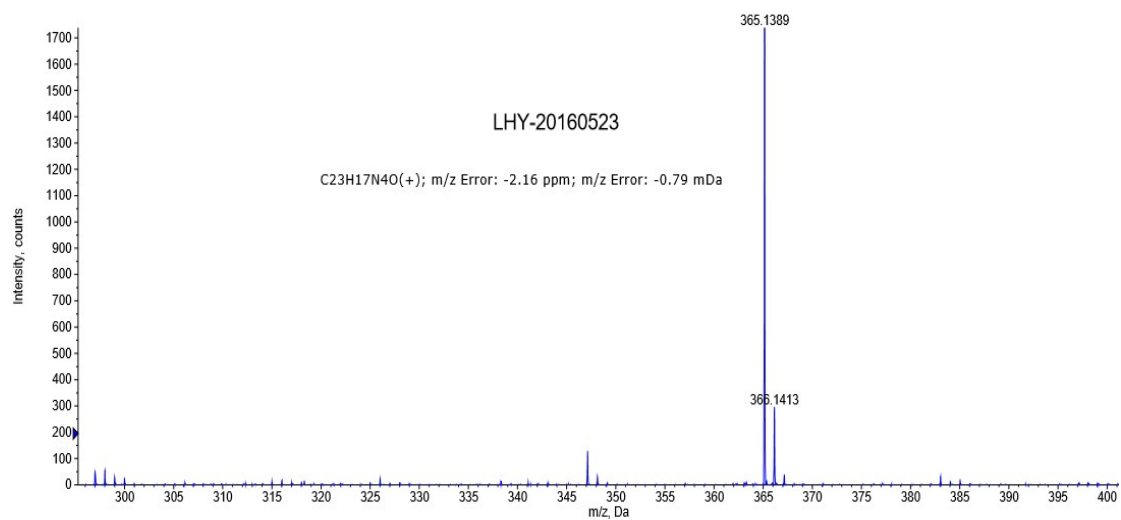

**Figure S4**, ESI mass spectra of QLBA. HRMS calcd for C<sub>23</sub>H<sub>16</sub>N<sub>4</sub>O [QLBA+H]<sup>+</sup>: 365.1397, Found: 365.1389.

### 3. The selectivity of QLBA

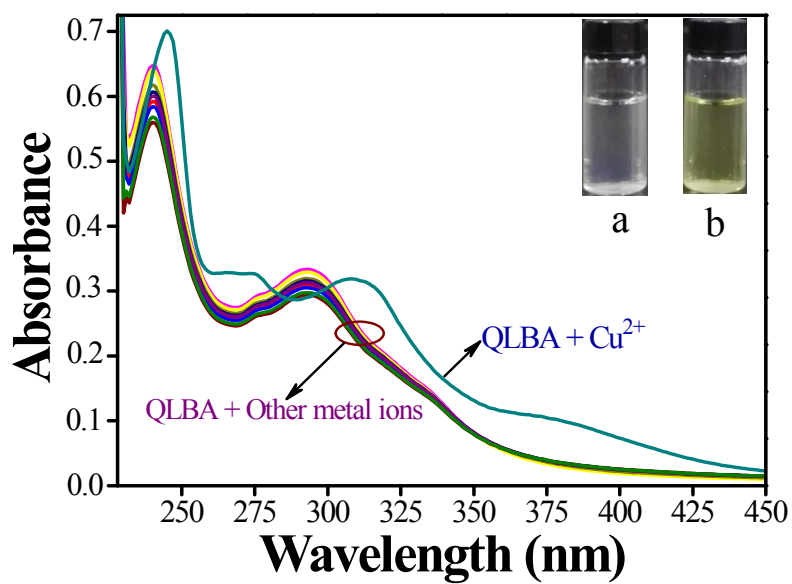

**Figure S5**, Absorption spectra obtained for QLBA (10 μM) in MeOH-HEPES buffer (1/9, v/v, pH 7.2) after the addition of 3.0 equiv. of Cu<sup>2+</sup>, Na<sup>+</sup>, K<sup>+</sup>, Mg<sup>2+</sup>, Ca<sup>2+</sup>, Co<sup>2+</sup>, Zn<sup>2+</sup>, Mn<sup>2+</sup>, Fe<sup>3+</sup>, Al<sup>3+</sup>, Cr<sup>3+</sup>, Pb<sup>2+</sup>, Hg<sup>2+</sup>, and Cd<sup>2+</sup>; Inset: Optical photographs (visible light) for QLBA (20 μM) after addition of (a) 3.0 equiv. of other metal ions and (b) 3.0 equiv. of Cu<sup>2+</sup>.

#### 4. Competitive experiments for QLBA

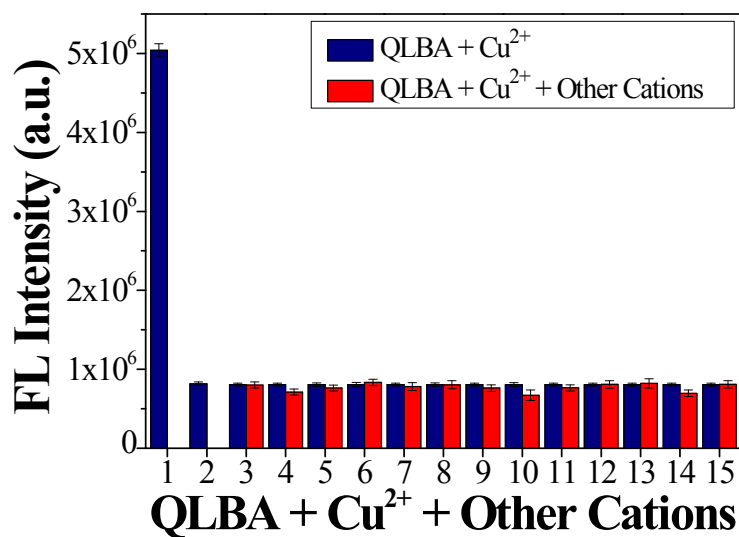

**Figure S6.** The fluorescence intensity at 435 nm of QLBA (10  $\mu$ M) with 30  $\mu$ M of Cu<sup>2+</sup> in CH<sub>3</sub>OH-HEPES buffer (1/9, v/v, pH 7.2), and then added 30  $\mu$ M of various metal ions. 1, QLBA; 2, Cu<sup>2+</sup>; 3, Cu<sup>2+</sup>+Na<sup>+</sup>; 4, Cu<sup>2+</sup>+K<sup>+</sup>; 5, Cu<sup>2+</sup>+Mg<sup>2+</sup>; 6, Cu<sup>2+</sup>+Ca<sup>2+</sup>; 7, Cu<sup>2+</sup>+Co<sup>2+</sup>; 8, Cu<sup>2+</sup>+Zn<sup>2+</sup>; 9, Cu<sup>2+</sup>+Mn<sup>2+</sup>; 10, Cu<sup>2+</sup>+Fe<sup>3+</sup>; 11, Cu<sup>2+</sup>+Al<sup>3+</sup>; 12, Cu<sup>2+</sup>+Cr<sup>3+</sup>; 13, Cu<sup>2+</sup>+Pb<sup>2+</sup>; 14, Cu<sup>2+</sup>+Hg<sup>2+</sup>; 15, Cu<sup>2+</sup>+Cd<sup>2+</sup> ( $\lambda_{ex}$ = 370 nm).



## 5. pH analysis

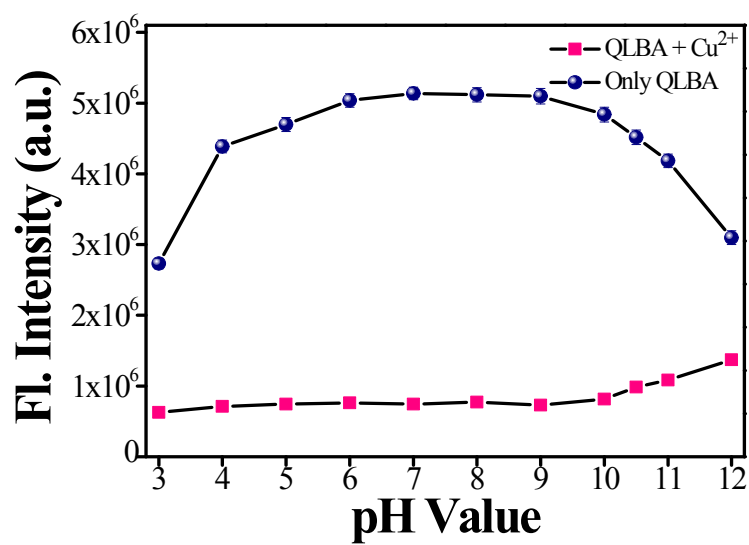

**Figure S7.** Fluorescence intensity recorded for QLBA (10  $\mu\text{M}$ ) at various pH values in the absence and presence of 3 equiv.  $\text{Cu}^{2+}$  ( $\lambda_{\text{ex}}= 370 \text{ nm}$ ,  $\lambda_{\text{em}}= 435 \text{ nm}$ ).

## 6. $^1\text{H}$ NMR of QLBA under different pH.

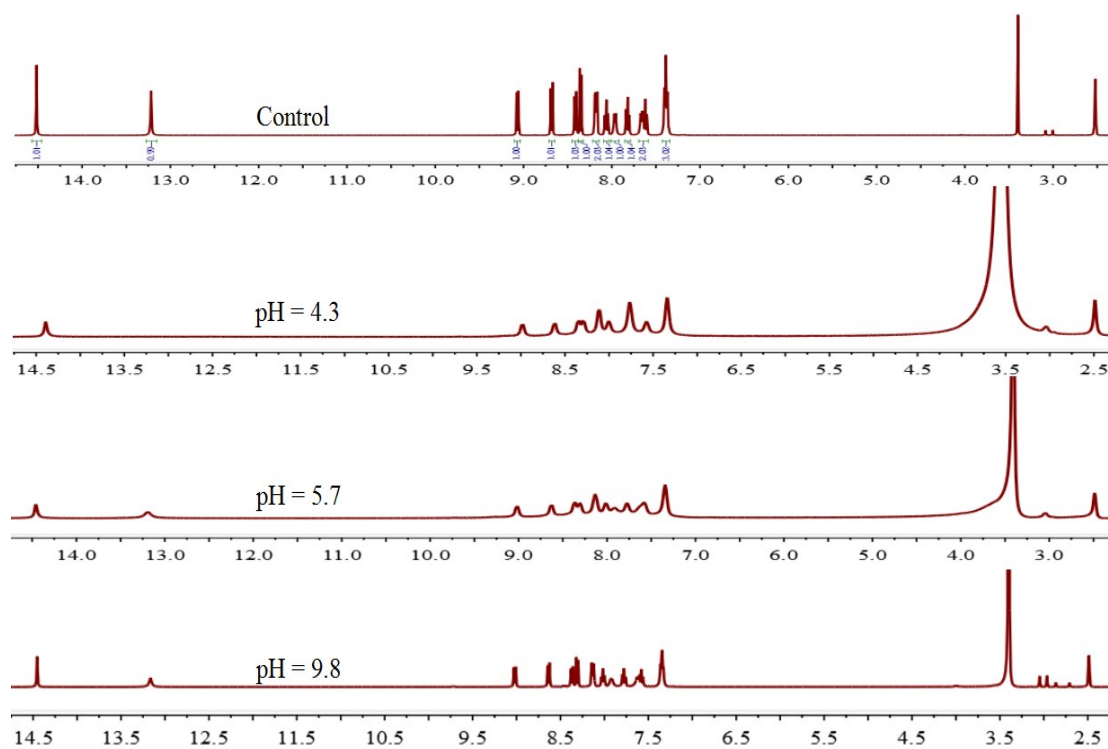

**Figure S8.**  $^1\text{H}$  NMR of QLBA under different pH conditions. Control: QLBA in  $\text{d}_6$ -DMSO.

## 7. HRMS for QLBA and QLBA-Cu under different pH.

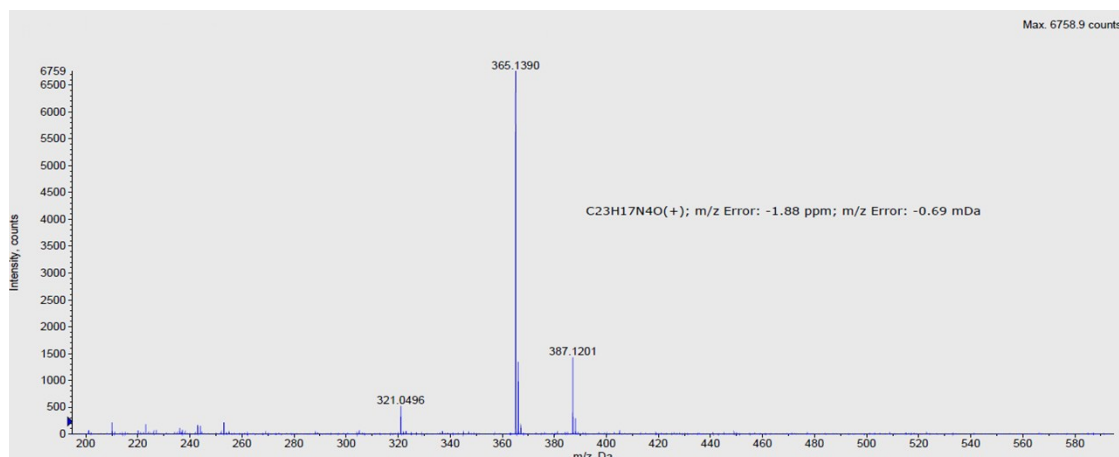

**Figure S9a.** ESI mass spectra of QLBA under pH=4.3 condition. Calcd for  $C_{23}H_{16}N_4O$  [QLBA+H]<sup>+</sup>: 365.1397, Found: 365.1390; Calcd for  $C_{23}H_{15}N_4ONa$  [QLBA+Na]<sup>+</sup>: 386.1144, Found: 386.1201.

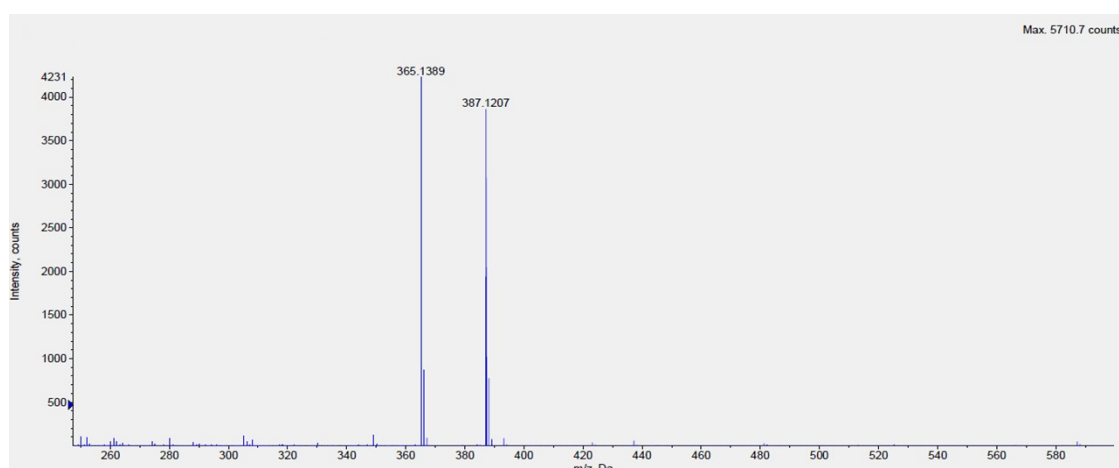

**Figure S9b.** ESI mass spectra of QLBA under pH=9.8 condition. Calcd for  $C_{23}H_{16}N_4O$  [QLBA+H]<sup>+</sup>: 365.1397, Found: 365.1389; Calcd for  $C_{23}H_{15}N_4ONa$  [QLBA+Na]<sup>+</sup>: 386.1144, Found: 386.1207.

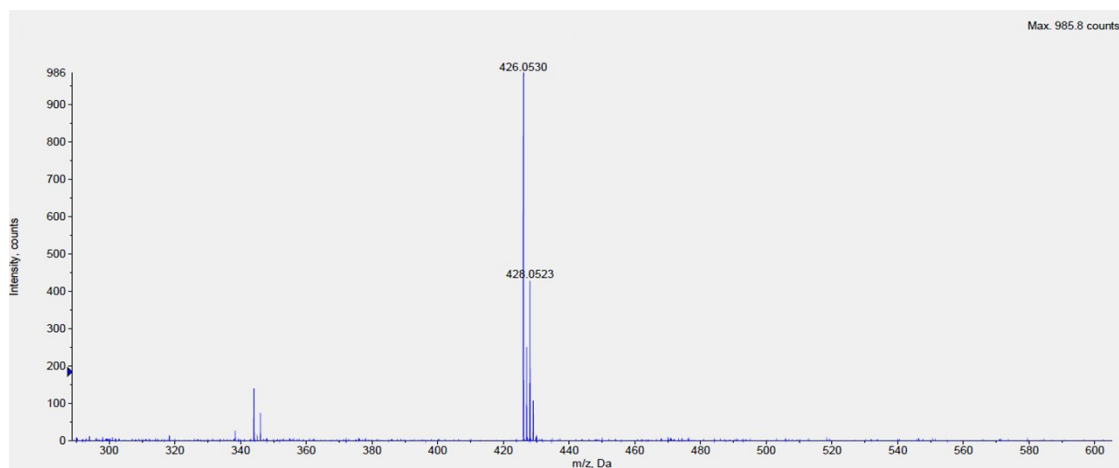

**Figure S9c.** ESI mass spectra of QLBA in the presence of  $\text{CuCl}_2$  (2 equiv.) under pH=4.3 condition. Calcd for  $[\text{QLBA} + \text{Cu} - \text{H}]^+$ : 426.0536, found: 426.0530.

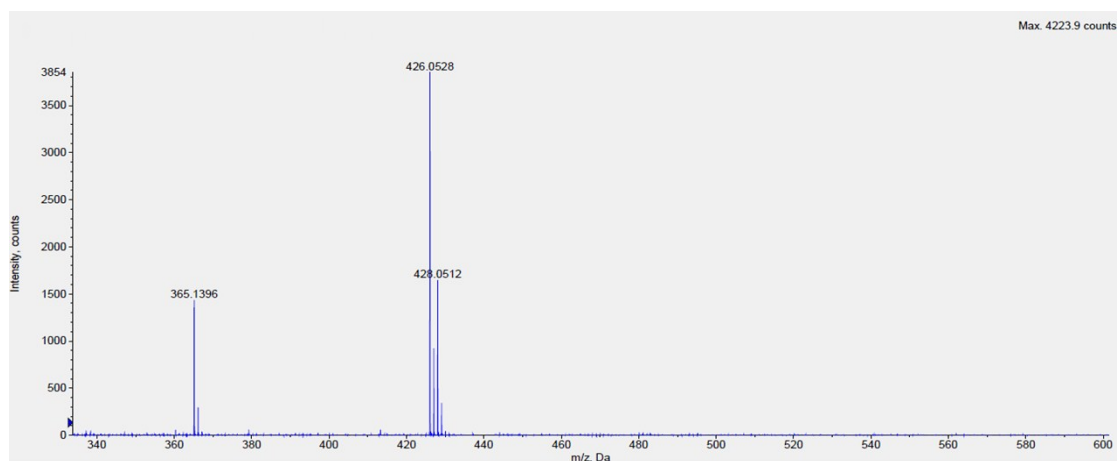

**Figure S9d.** ESI mass spectra of QLBA in the presence of  $\text{CuCl}_2$  (2 equiv.) under pH=9.8 condition. Calcd for  $[\text{QLBA} + \text{Cu} - \text{H}]^+$ : 426.0536, found: 426.0528.

## 8. Fluorescence titration analysis

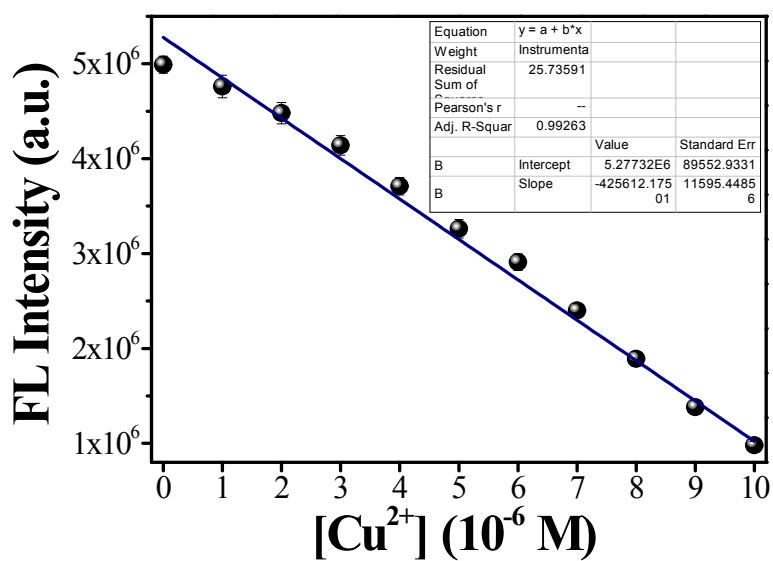

**Figure S10.** Calibration curve obtained for fluorescence intensity of QLBA (10  $\mu\text{M}$ ) versus the concentration changes of  $\text{Cu}^{2+}$  ions in MeOH-HEPES buffer (1/9, v/v, pH 7.2). The spectra were obtained 10 min after  $\text{Cu}^{2+}$  addition ( $\lambda_{\text{ex}} = 370 \text{ nm}$ ,  $\lambda_{\text{em}} = 435 \text{ nm}$ ).

## 9. Fluorescence titration analysis in tap-water

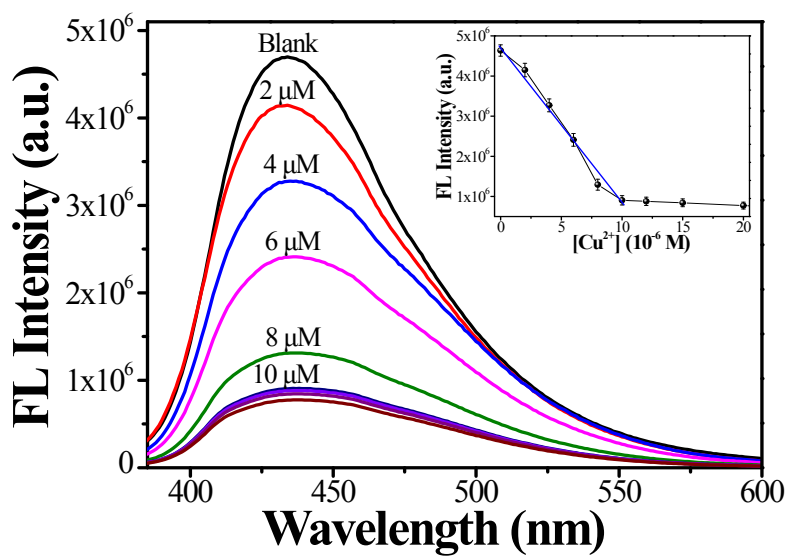

**Figure S11.** (a) Fluorescence emission spectra and (b) variation of fluorescence intensity recorded for QLBA (10 μM) upon gradual addition of Cu<sup>2+</sup> (0, 2, 4, 6, 8, 10, 12, 15, 20 μM) in tap water-MeOH (v/v, 9/1). ( $\lambda_{\text{ex}} = 370 \text{ nm}$ ,  $\lambda_{\text{em}} = 435 \text{ nm}$ ).

## 10. MTT analysis

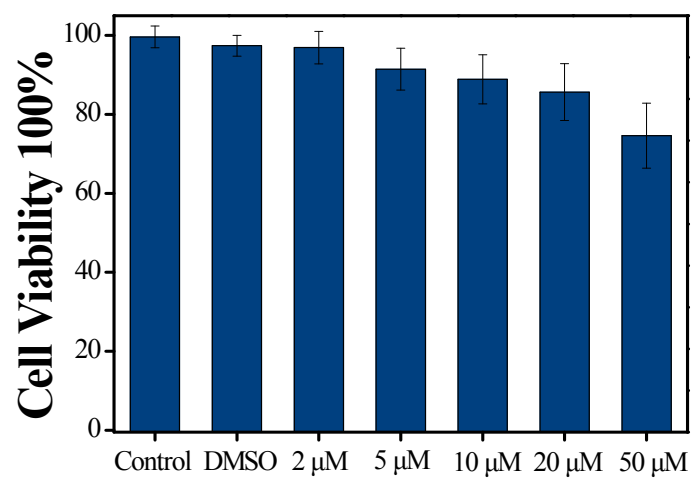

**Figure S12.** MTT assay of QLBA on HeLa cells (with QLBA 0, 2, 5, 10, 20, 50 μM) for 24h (DMSO denotes: Only 0.5% DMSO).

## 11. Calculation of the limit of detection

The limit of detection (*LOD*) was calculated based on the fluorescence titration according to the following equation (Eq. S1) [1,2], where  $Sb_1$  is the standard deviation of the blank solution and  $S$  is the slope of the calibration curve in Figure S6. To determine  $Sb_1$ , the emission intensity of QLBA in MeOH–HEPES buffer (1/9, v/v, pH 7.2) without any metal ions was measured 10 times, respectively.

$$DL = 3 \times \frac{Sb_1}{S} \quad \text{(Eq. S1)}$$



## 12. References

- [1] Barba-Bon, A., Costero, A.M., Gil, S., Parra, M., Soto, J., Martínez-Máñez, R. et al., **2012**. *Chem. Commun.* 48, 3000-3002.
- [2] T. Mistri, R. Alam, M. Dolai, S. K. Mandal, A. R. Khuda-Bukhsh, M. Ali, *Org. Biomol. Chem.*, 2013, 11, 1563-1569.
